# Supplementary material for: The role of l-cysteine and introduced surface defects in reactive oxygen species generation by ZnO nanoparticles
Source: Royal Society of Chemistry journal article supplement (doi:10.1039/c8dt00725j), 2018-01-01
Supplement: c8dt00725j1.pdf [file c8dt00725j1.pdf]

## Supporting Information

for

### The role of L-Cysteine and introduced surface defects in reactive oxygen species generation by ZnO nanoparticles

Dominika Wawrzyńczyk<sup>1,\*</sup>, Bartłomiej Cichy<sup>2</sup>, Wiesław Stręk<sup>2</sup>  
and Marcin Nyk<sup>1</sup>

<sup>1</sup> *Advanced Materials Engineering and Modelling Group, Faculty of Chemistry, Wrocław University of Technology, Wybrzeże Wyspiańskiego 27, 50-370 Wrocław, Poland*

<sup>2</sup> *Institute of Low Temperature and Structure Research, PAS, Okólna 2, 50-422 Wrocław, Poland*

\* corresponding author: dominika.wawrzynczyk@pwr.edu.pl

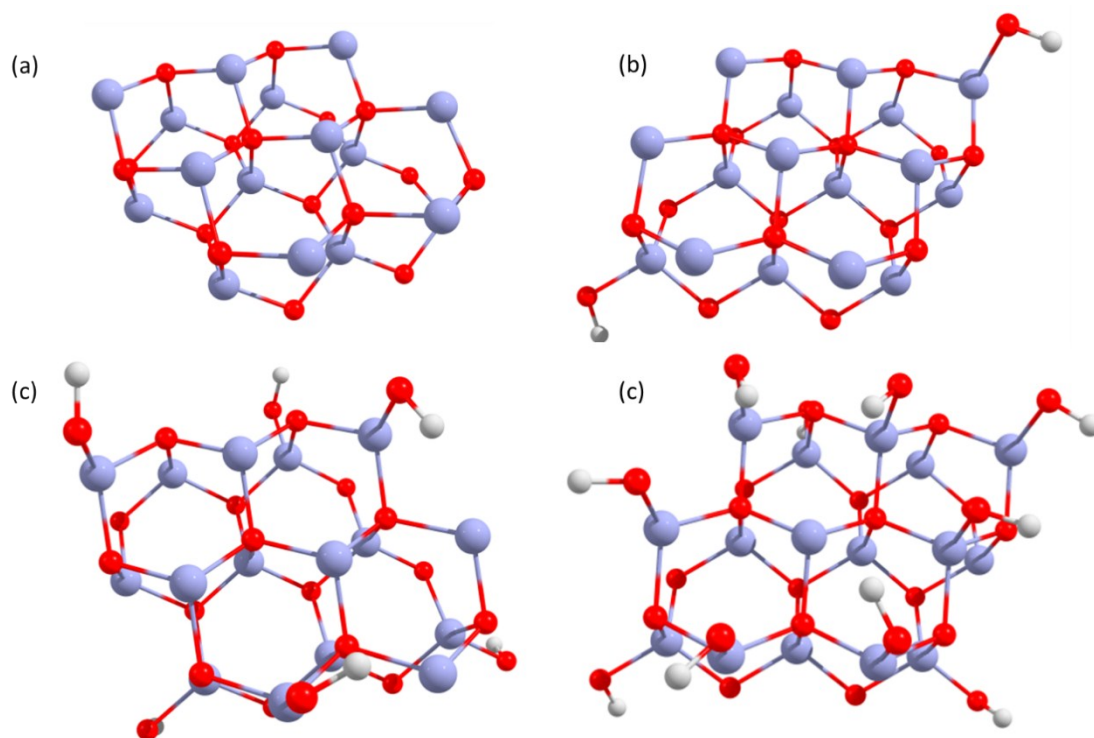

**Figure S1** Unoptimized geometries of the Zn<sub>16</sub>O<sub>16</sub> clusters with the (a) 0, (b) 2, (c) 6 and (d) 10 OH groups adhered to the cluster's surface.



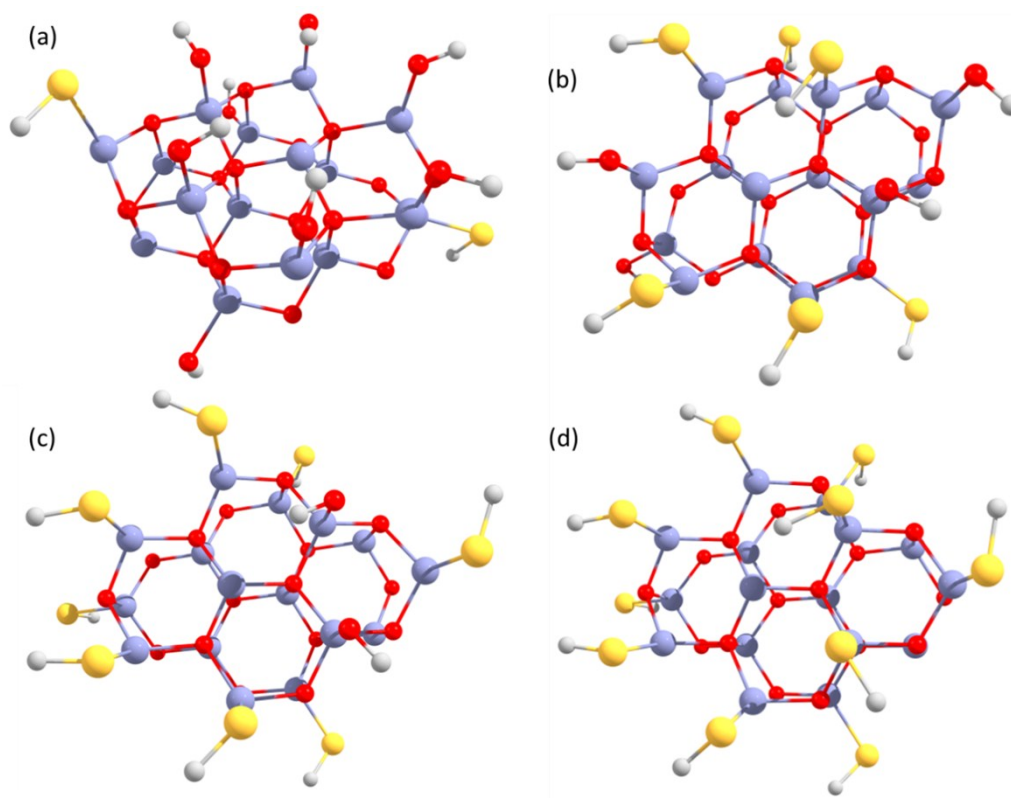

**Figure S2** The unoptimized geometries of the  $\text{Zn}_{16}\text{O}_{16}$  clusters with the (a) 2xSH, 8xOH (b) 6xSH, 4xOH (c) 8xSH, 2xOH and (d) 10 SH groups adhered to the cluster's surface.

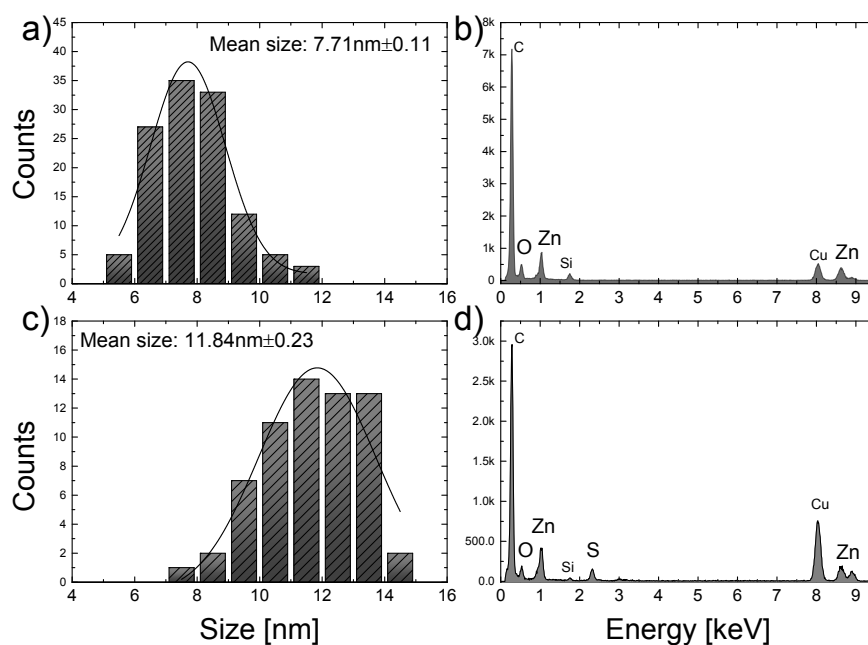

**Figure S3** Size distribution histograms of as-synthesized raw-ZnO NPs (a) and after surface functionalization with L-Cysteine molecules (2 mmol) (c) calculated based on TEM images, together with EDS spectrum before (b) and after (d) surface functionalization.



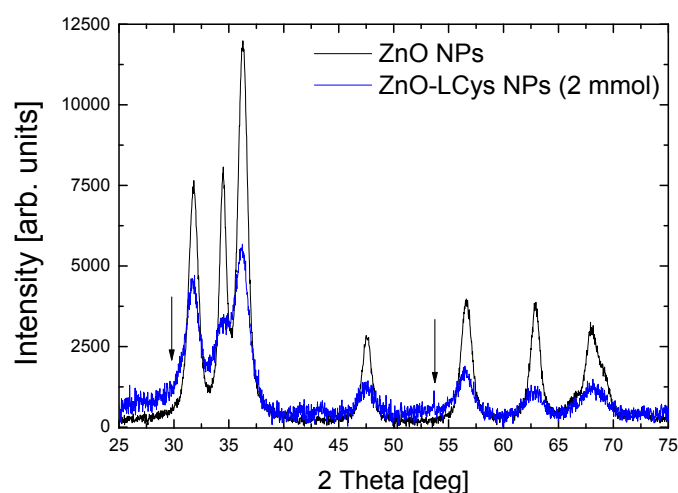

**Figure S4** XRD patterns of as synthesized ZnO NPs powder (black) and the powder obtained after drying a dispersion of ZnO-LCys NPs (blue).

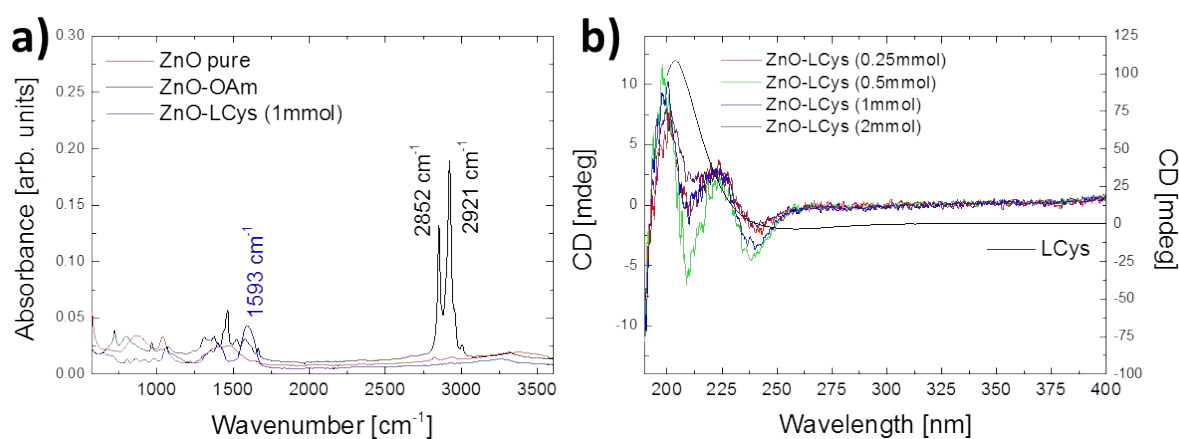

**Figure S5** Representative FTIR spectra of ZnO NPs before and after surface functionalization with L-Cysteine and Oleylamine molecules (a), and CD spectra of L-Cysteine functionalized ZnO NPs compared to the spectra of pure L-Cysteine molecules in water.



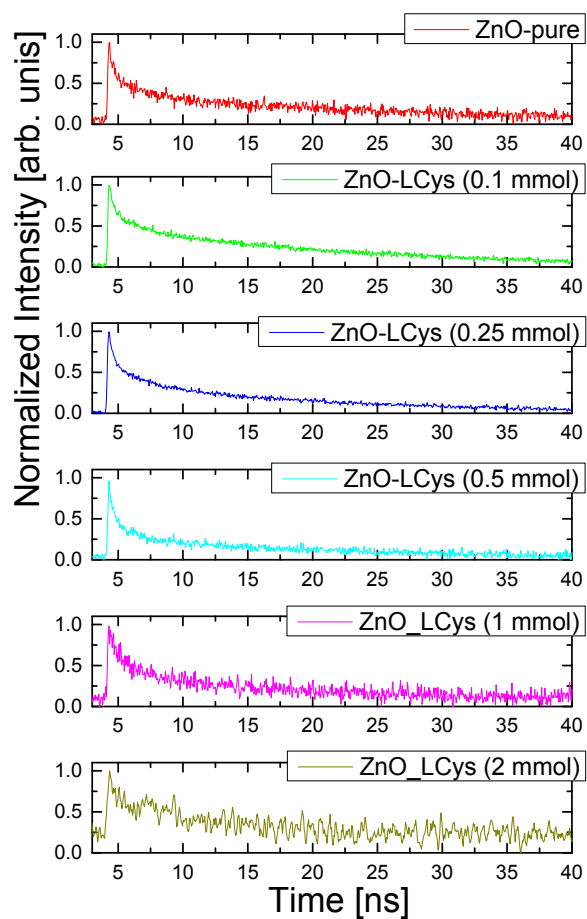

**Figure S6** Luminescence decays curves for visible ( $\lambda_{EM}=540$  nm) emission in ZnO NPs functionalized with different amounts of L-Cys molecules.



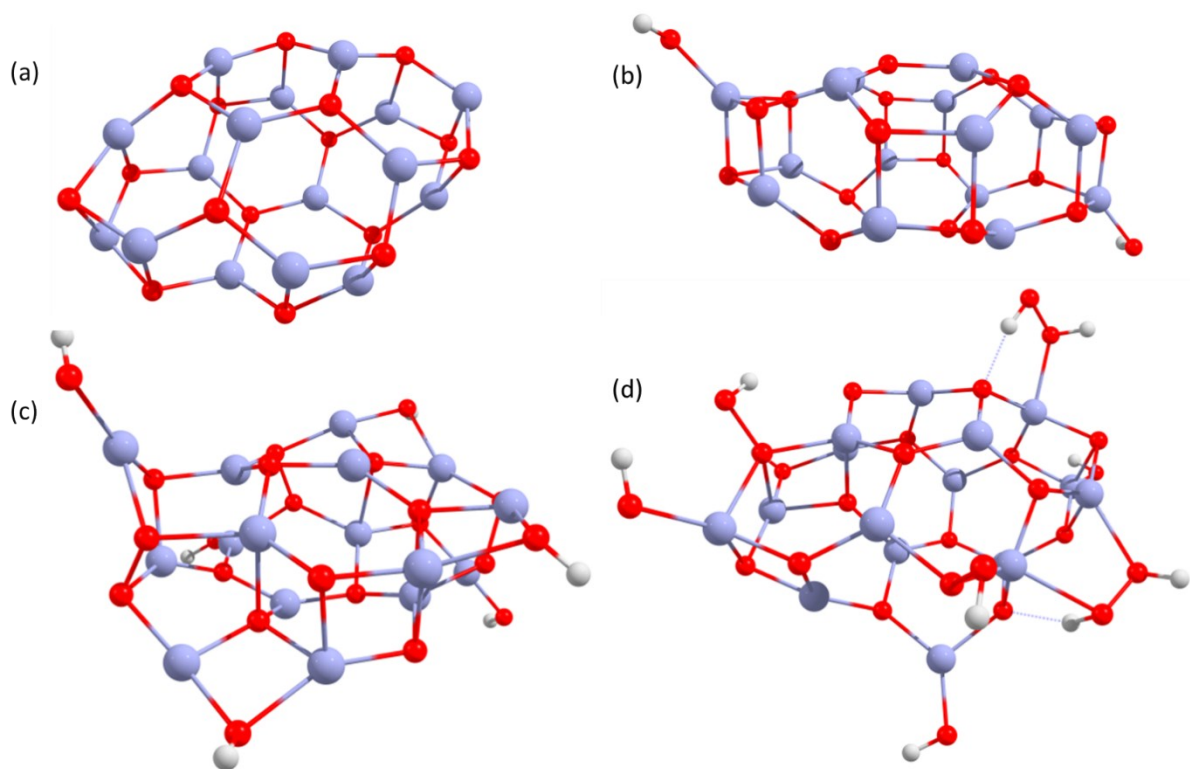

**Figure S7** The stationary point geometries of the Zn<sub>16</sub>O<sub>16</sub> clusters with the (a) 0, (b) 2, (c) 6 and (d) 10 OH groups adhered to the cluster's surface.

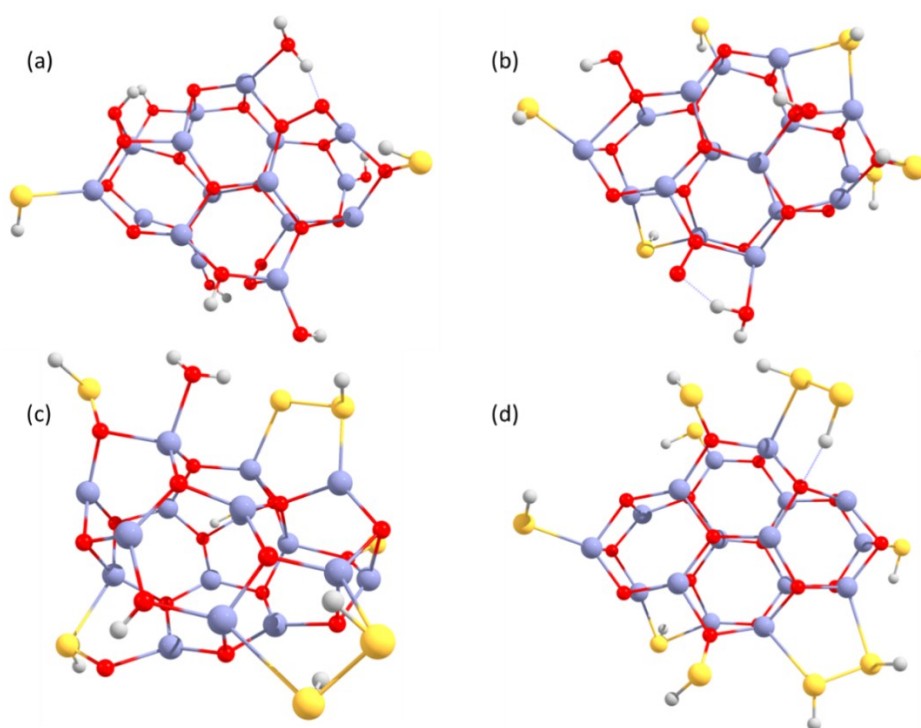

**Figure S8** The stationary point geometries of the Zn<sub>16</sub>O<sub>16</sub> clusters with the (a) 2xSH, 8xOH (b) 6xSH, 4xOH (c) 8xSH, 2xOH and (d) 10 SH groups adhered to the cluster's surface.



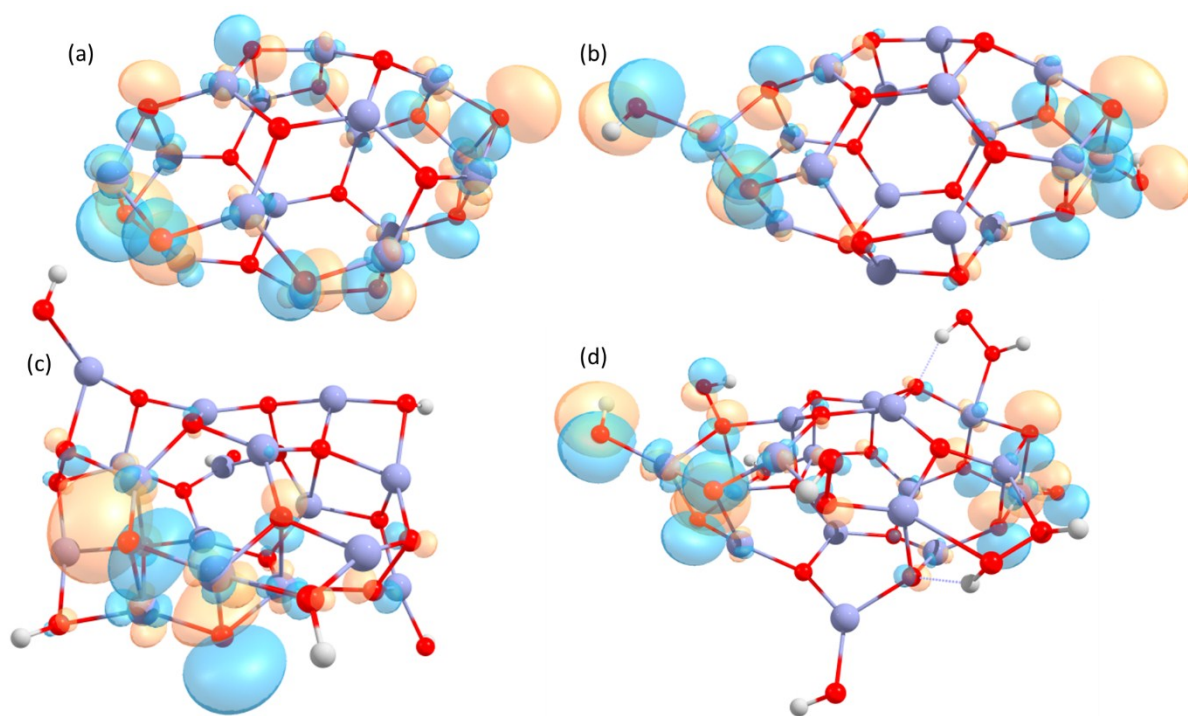

**Figure S9** The stationary point geometries of the  $\text{Zn}_{16}\text{O}_{16}$  clusters with various number of the OH groups attached to the surface i.e. (a)  $0\times\text{OH}$ , (b)  $2\times\text{OH}$ , (c)  $8\times\text{OH}$  and (d)  $10\times\text{OH}$ . The HOMO orbitals are shown for each optimized structure.

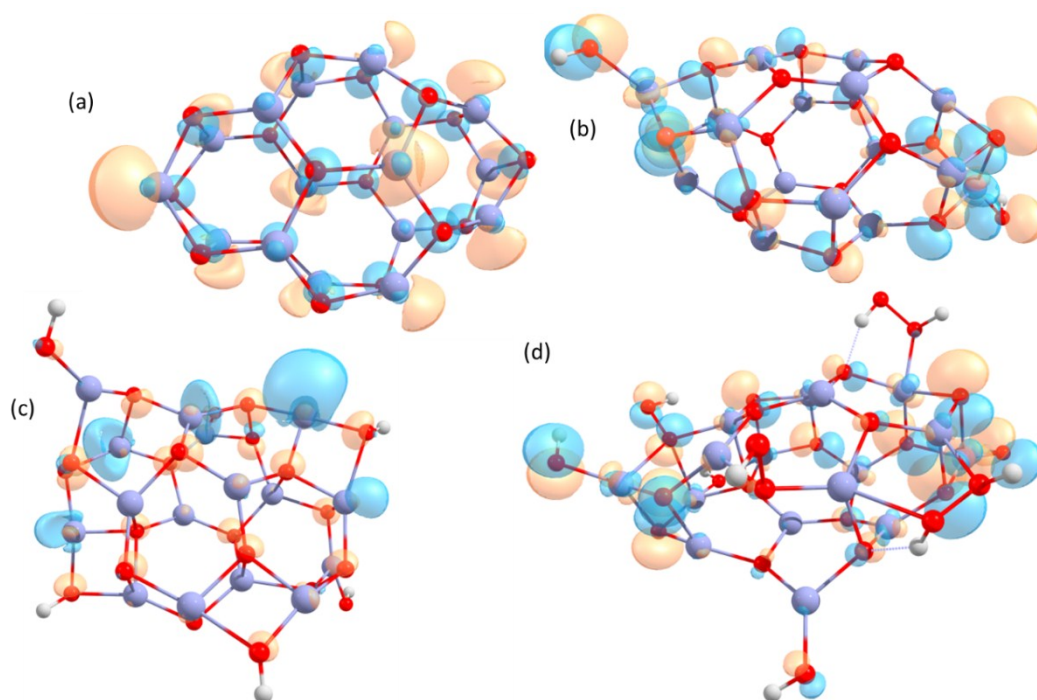

**Figure S10** The stationary point geometries of the  $\text{Zn}_{16}\text{O}_{16}$  clusters with various number of the OH groups attached to the surface i.e. (a)  $0\times\text{OH}$ , (b)  $2\times\text{OH}$ , (c)  $8\times\text{OH}$  and (d)  $10\times\text{OH}$ . The LUMO orbitals are shown for each optimized structure.



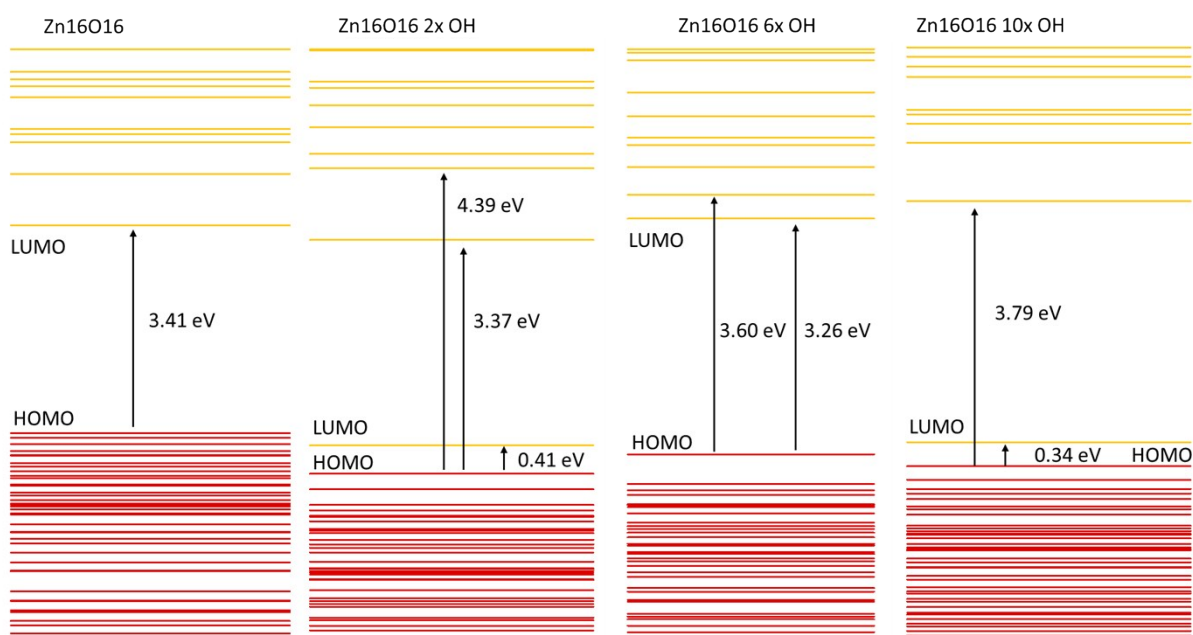

**Figure S11** The energy diagrams for the  $\text{Zn}_{16}\text{O}_{16}$  clusters with various number of the OH groups attached to the surface i.e. (a) 0xOH, (b) 2xOH, (c) 8xOH and (d) 10xOH.

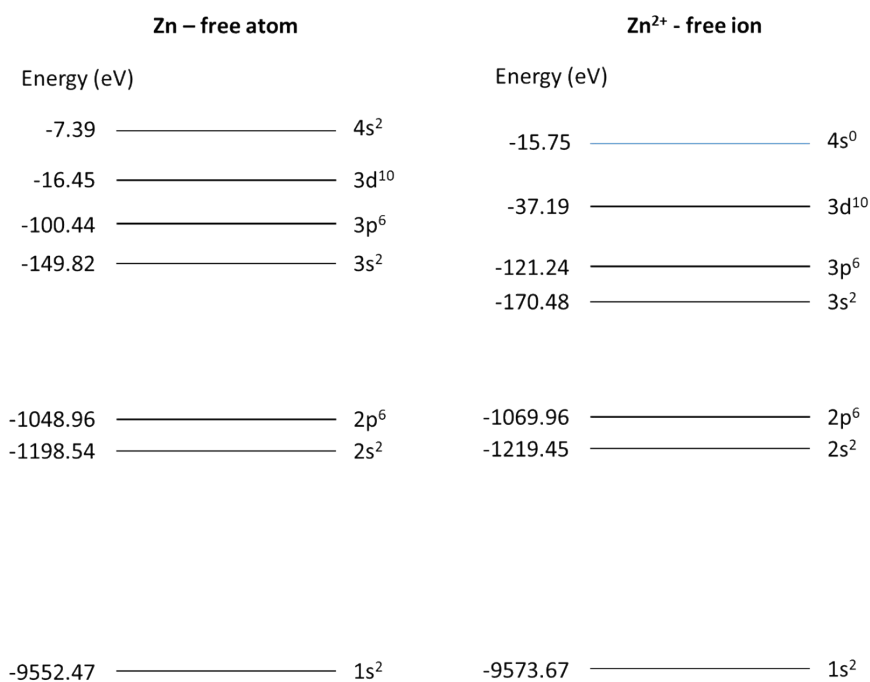

**Figure S12** The energies of the atomic orbitals calculated for the (a) neutral Zn atom and the (b) free  $\text{Zn}^{2+}$  ion. The first virtual orbital was related to the 4s state has been colored in blue.



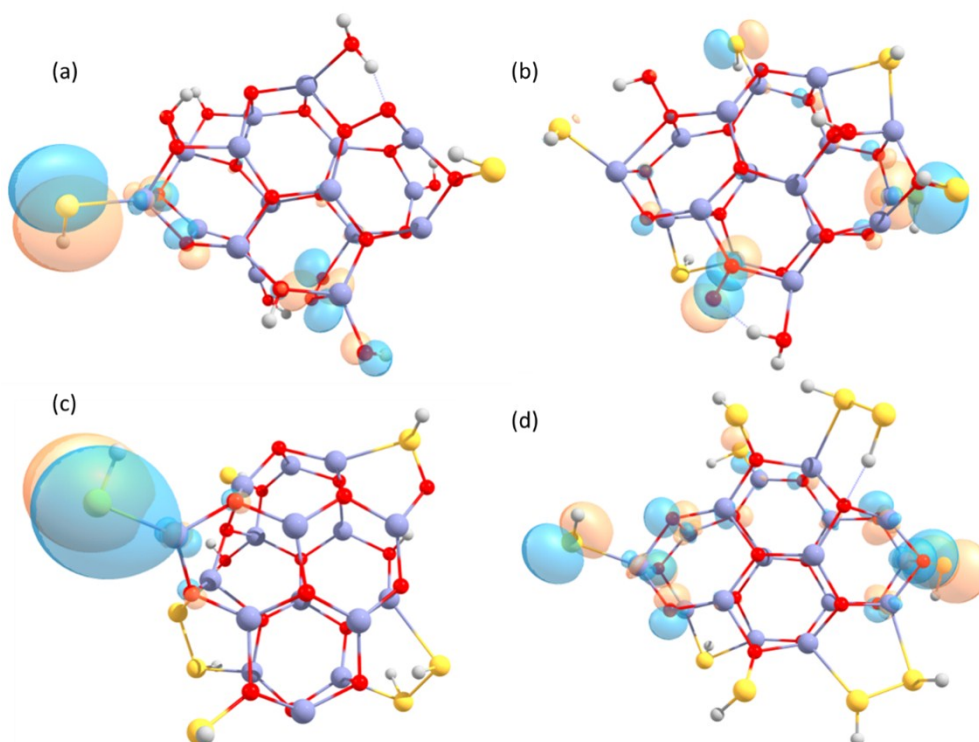

**Figure S13** The stationary point geometries of the  $\text{Zn}_{16}\text{O}_{16}$  clusters with the (a) 2xSH, 8xOH (b) 6xSH, 4xOH (c) 8xSH, 2xOH and (d) 10 SH groups adhered to the cluster's surface. HOMO orbitals has been depicted.

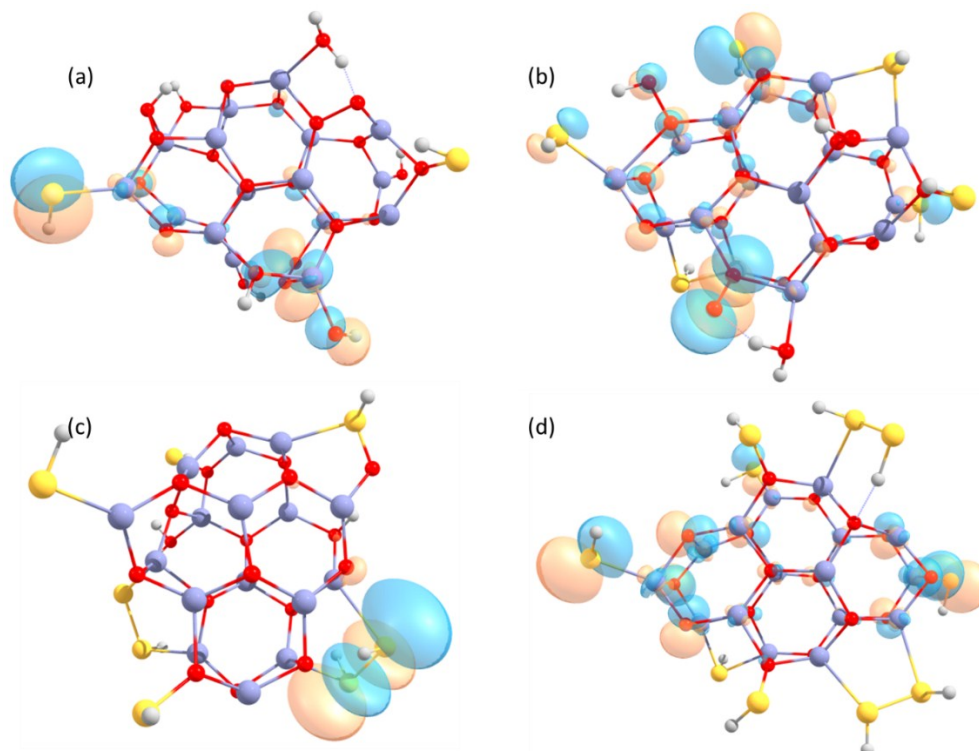

**Figure S14** The stationary point geometries of the  $\text{Zn}_{16}\text{O}_{16}$  clusters with the (a) 2xSH, 8xOH (b) 6xSH, 4xOH (c) 8xSH, 2xOH and (d) 10 SH groups adhered to the cluster's surface. HOMO orbitals has been depicted.



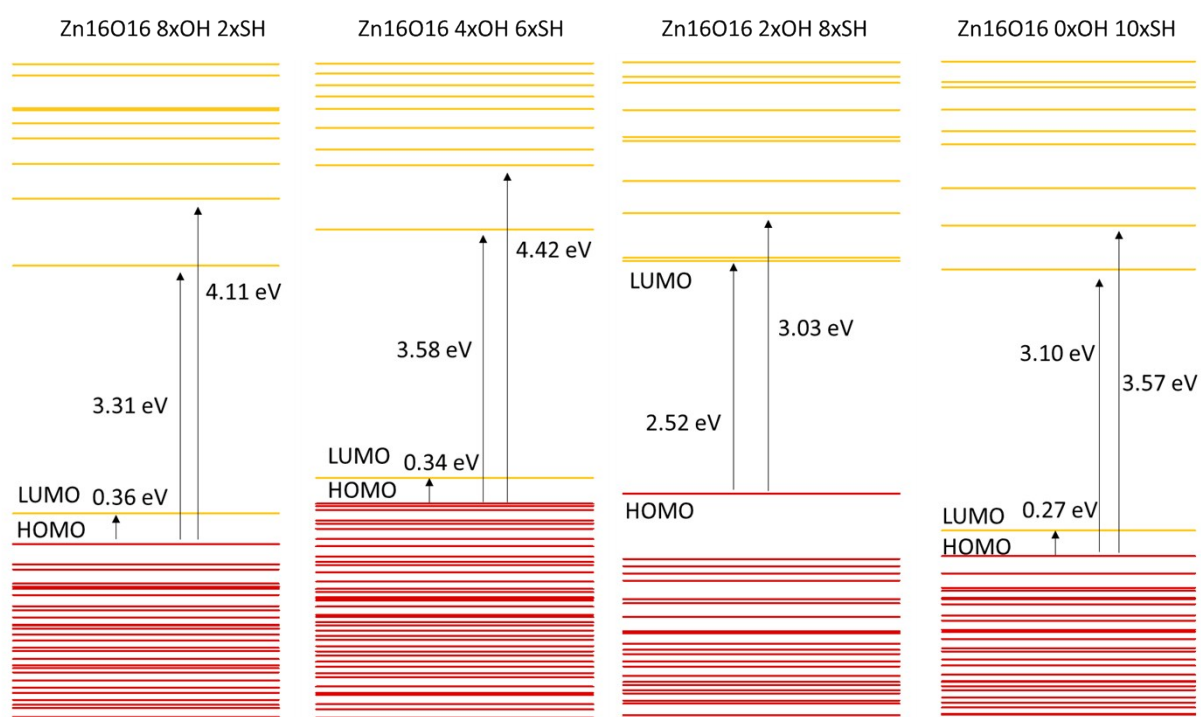

**Figure S15** The energy diagrams for the  $\text{Zn}_{16}\text{O}_{16}$  clusters modified by the (a) 2xSH, 8xOH (b) 6xSH, 4xOH (c) 8xSH, 2xOH and (d) 10 SH groups adhered to the cluster's surface.
